# Supplementary material
Source: HighWire-hosted journal article supplement (https://www.annfammed.org/highwire/filestream/15771/field_highwire_adjunct_files/0/Tong.pdf)
Supplement: Tong.pdf [file Tong.pdf]

Supplemental materials for

Sirkin JT, Flanagan E, Tong ST, et al. Primary Care's challenges and responses in the face of the COVID-19 pandemic: insights from AHRQ's learning community. *Ann Fam Med*. 2023;21(1):76-82.

## Supplemental Appendix. AHRQ Primary Care Learning Community Topics & Speakers

| Date    | Topic                                                                                                     | Speakers/Panelists                                                                                                                                                                                                                                                                                                                                                                    |
|---------|-----------------------------------------------------------------------------------------------------------|---------------------------------------------------------------------------------------------------------------------------------------------------------------------------------------------------------------------------------------------------------------------------------------------------------------------------------------------------------------------------------------|
| 12/9/20 | Providing Whole Person Care in the Age of COVID-19                                                        | <ul style="list-style-type: none"><li>• Julia Wolfson, <i>University of Michigan School of Public Health</i></li><li>• Martha Hostetter, <i>Commonwealth Fund</i></li></ul>                                                                                                                                                                                                           |
|         | The Role of Practice Facilitation and Other Quality Improvement                                           |                                                                                                                                                                                                                                                                                                                                                                                       |
| 1/27/21 | Strategies in Supporting Primary Care Practices During the COVID-19 Pandemic                              | Breakout group discussions                                                                                                                                                                                                                                                                                                                                                            |
| 3/3/21  | The Role of Primary Care in Dispelling Myths and Misinformation and Promoting COVID-19 Vaccine Confidence | <ul style="list-style-type: none"><li>• Ann Christiano, <i>Center for Public Interest Communications, University of Florida</i></li></ul>                                                                                                                                                                                                                                             |
|         | Experiences with Supporting Primary Care and COVID-19 Vaccination Efforts                                 | <ul style="list-style-type: none"><li>• Donald Nease, MD, <i>Green-Edelman Chair for Practice-Based Research, University of Colorado</i></li><li>• Zsolt Nagykalai, PhD, <i>Department of Family and Preventive Medicine, University of Oklahoma Health Sciences Center</i></li><li>• Joi Wright, MS, <i>Department of Community and Family Medicine, Howard University</i></li></ul> |
| 5/26/21 | Current and Future Use of Telehealth in Primary Care                                                      | <ul style="list-style-type: none"><li>• Theresa Walunas, PhD, <i>Northwestern University</i></li><li>• Nita Mohanty, MD, <i>Alliance Chicago</i></li><li>• Andrew Bienstock, <i>University of Colorado Anschutz Medical Campus</i></li></ul>                                                                                                                                          |

|          |                                                                                                             |                                                                                                                                                                                                                                                                                                                                                                                                                                                                                                                                                                                                                                                                              |
|----------|-------------------------------------------------------------------------------------------------------------|------------------------------------------------------------------------------------------------------------------------------------------------------------------------------------------------------------------------------------------------------------------------------------------------------------------------------------------------------------------------------------------------------------------------------------------------------------------------------------------------------------------------------------------------------------------------------------------------------------------------------------------------------------------------------|
|          |                                                                                                             | <ul style="list-style-type: none"> <li>• Patricia Rose, <i>Purdue Healthcare Advisors</i></li> <li>• Chris Weathington, <i>North Carolina Area Health Education Center</i></li> </ul>                                                                                                                                                                                                                                                                                                                                                                                                                                                                                        |
| 6/30/21  | Integrating Primary Care and Public Health in Response to COVID-19                                          | <ul style="list-style-type: none"> <li>• Therese Miller, DrPH, <i>AHRQ</i></li> <li>• Juliana Anastasoff, MS, <i>Health Extension Rural Offices, University of New Mexico</i></li> <li>• Kimberly Smith, PhD, <i>Alabama Practice-Based Research Network</i></li> <li>• Howard Haft, MD, <i>Maryland Primary Care Program, Maryland Department of Health</i></li> </ul>                                                                                                                                                                                                                                                                                                      |
| 9/29/21  | Integrating Behavioral Health and Primary Care during COVID-19                                              | <ul style="list-style-type: none"> <li>• Sebastian Tong, MD, MPH, <i>Senior Staff Fellow, Center for Evidence and Practice Improvement, AHRQ</i></li> <li>• J. Paul Seale, MD, <i>Institute of Public and Preventive Health and Departments of Psychiatry and Family Medicine, Augusta University</i></li> <li>• Aaron Williams, MA, <i>Integrated Care Consultant, National Council for Mental Well-Being</i></li> <li>• Nick Szubiak, MSW, LCSW, <i>Principal, NSI Strategies</i></li> </ul>                                                                                                                                                                               |
| 11/10/21 | Supporting Well-being During COVID-19 and Beyond: Individual and Organizational Approaches for Primary Care | <ul style="list-style-type: none"> <li>• Katherine J. Gold, MD, MSW, MS, <i>Associate Professor, Department of Family Medicine, University of Michigan</i></li> <li>• Lou Baptista, MD, <i>Vice Chair for Clinical Services, Department of Psychiatry, Columbia University</i></li> <li>• Joelle Monaco, MBA, <i>Director of Outreach and Business Engagement, Mental Health Association in New York State, Inc</i></li> <li>• Mark Linzer, MD, MACP, <i>M. Thomas Stillman Endowed Chair and Vice-Chair for Education, Mentorship and Scholarship in the Department of Medicine at Hennepin Healthcare, and Professor of Medicine at University of Minnesota</i></li> </ul> |
